# Supplementary material for: COVID-19-Related Burnout and Intention of Fully Vaccinated Individuals to Get a Booster Dose: The Mediating Role of Resilience
Source: MDPI journal article supplement (doi:10.3390/vaccines11010062), 2022-12-27
Supplement: s1 [file s1]

**Supplementary Table S1.** Corrected item-total correlations for the 13 items of the COVID-19 burnout scale.

| <b>Factors</b>                                         | <b>Items</b>                                                                                    | <b>Corrected item-total correlations</b> |
|--------------------------------------------------------|-------------------------------------------------------------------------------------------------|------------------------------------------|
| <b>Emotional exhaustion</b>                            | 1. I feel emotionally tired because of the COVID-19 pandemic                                    | 0.682                                    |
|                                                        | 2. I feel sad because of the COVID-19 pandemic                                                  | 0.636                                    |
|                                                        | 3. I feel angry because of the COVID-19 pandemic                                                | 0.721                                    |
|                                                        | 4. I feel frustrated because of the COVID-19 pandemic                                           | 0.729                                    |
|                                                        | 5. I feel upset because of the COVID-19 pandemic                                                | 0.739                                    |
| <b>Physical exhaustion</b>                             | 6. I feel physically tired because of the COVID-19 pandemic                                     | 0.726                                    |
|                                                        | 7. I have lost my energy because of the COVID-19 pandemic                                       | 0.686                                    |
|                                                        | 8. I have difficulties in sleep because of the COVID-19 pandemic                                | 0.530                                    |
|                                                        | 9. I feel tired in my daily life because of the COVID-19 pandemic                               | 0.703                                    |
| <b>Exhaustion due to measures against the COVID-19</b> | 10. I feel tired applying personal protection measures, e.g. wearing a face mask                | 0.607                                    |
|                                                        | 11. I feel tired applying measures in case of COVID-19 symptoms, e.g. rapid tests and PCR tests | 0.599                                    |
|                                                        | 12. I feel tired applying measures in case of COVID-19 infection, e.g. isolation                | 0.615                                    |
|                                                        | 13. I feel tired of getting vaccinated against coronavirus                                      | 0.531                                    |
