# Supplementary figures and images for: COVID-19-Related Burnout and Intention of Fully Vaccinated Individuals to Get a Booster Dose: The Mediating Role of Resilience
Source: MDPI journal article supplement (doi:10.3390/vaccines11010062), 2022-12-27

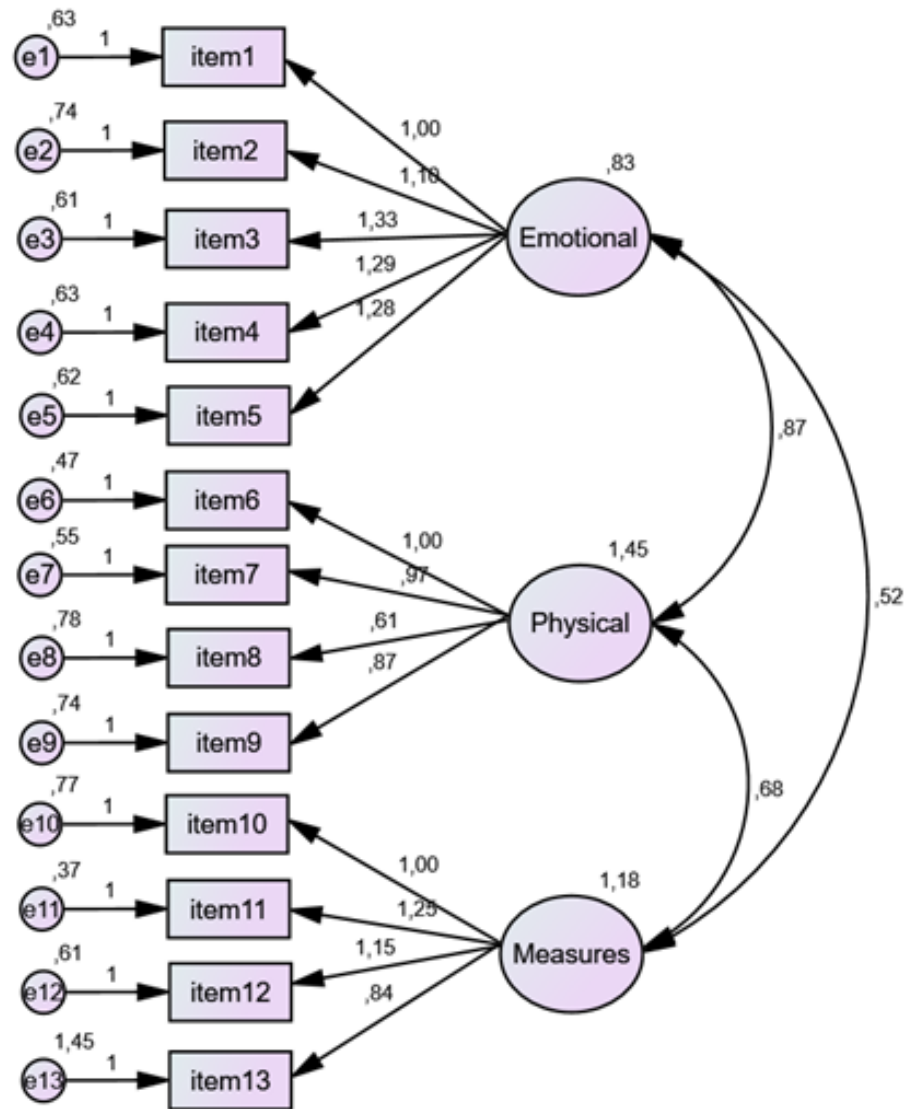

Supplement: s1 [file s1]
